# Supplementary material for: Elevated expression of CST1 promotes breast cancer progression and predicts a poor prognosis
Source: PubMed Central journal article supplement (PMC5515997; doi:10.1007/s00109-017-1537-1), 2017-05-18
Supplement: 109_2017_1537_MOESM1_ESM.pdf [file 109_2017_1537_MOESM1_ESM.pdf]

## **Electronic supplementary material (ESM)**

**J Mol Med 2017**

**Title: Elevated expression of CST1 promotes breast cancer progression and predicts a poor prognosis**

Da-nian Dai<sup>1,2\*</sup>, Yan Li<sup>1\*</sup>, Bo Chen<sup>1,2\*</sup>, Yong Du<sup>1\*</sup>, Shi-bing Li<sup>1</sup>,  
Shi-xun Lu<sup>3</sup>, Zhi-ping Zhao<sup>4</sup>, Ai-jun Zhou<sup>1</sup>, Ning Xue<sup>1</sup>, Tian-liang Xia<sup>1</sup>,  
Mu-sheng Zeng<sup>1</sup>, Qian Zhong<sup>1</sup>, Wei-dong Wei<sup>1,2</sup>

1.State Key Laboratory of Oncology in South China, Collaborative  
Innovation Center for Cancer Medicine, Sun Yat-Sen University Cancer  
Center, Guangzhou, Guangdong, China

2.Department of Breast Oncology, Sun Yat-Sen University Cancer Center,  
Guangzhou, China

3.Department of Pathology, Sun Yat-Sen University Cancer Center,  
Guangzhou, China

4.Institute of Hepatopancreatobiliary Surgery, Southwest Hospital, Third  
Military Medical University, Chongqing, China

\*These authors contributed equally to this work

Corresponding authors:

Weidong Wei

weiwd@sysucc.org.cn

Tel.020-87343806

Qian Zhong

zhongqian@sysucc.org.cn

Tel.020-87342662

## Supplementary tables

**Table S1. Correlation between CST1 expression and clinicopathological variables of breast cancer cases**

| Variables                   | Cases (n=244) | CST1 expression |             | P value       |
|-----------------------------|---------------|-----------------|-------------|---------------|
|                             |               | Low             | High        |               |
| Age (years)                 |               |                 |             | 0.493         |
| ≤50                         | 130           | 25 (19.2%)      | 105 (80.8%) |               |
| >50                         | 114           | 26 (22.8%)      | 88 (77.2%)  |               |
| Gender                      |               |                 |             |               |
| female                      | 244           | 51 (20.9%)      | 193 (79.1%) |               |
| Menarche age                |               |                 |             | <b>0.017*</b> |
| ≤16                         | 200           | 36 (18.0%)      | 164 (82.0%) |               |
| >16                         | 44            | 15 (34.1%)      | 29 (65.9%)  |               |
| Menopause                   |               |                 |             | 0.675         |
| no                          | 145           | 29 (20.0%)      | 116 (80.0%) |               |
| yes                         | 99            | 22 (22.2%)      | 77 (77.8%)  |               |
| Tumor Size                  |               |                 |             | <b>0.005*</b> |
| ≤2.5                        | 84            | 26 (31.0%)      | 58 (69.0%)  |               |
| >2.5                        | 160           | 25 (15.6%)      | 135 (84.4%) |               |
| Pathological LN infiltrated |               |                 |             | 0.093         |

|                                   |     |            |             |                   |
|-----------------------------------|-----|------------|-------------|-------------------|
| no                                | 68  | 19 (27.9%) | 49 (72.1%)  |                   |
| yes                               | 176 | 32 (18.2%) | 144 (81.8%) |                   |
| Tumor location                    |     |            |             | 0.358             |
| left                              | 124 | 23 (18.5%) | 101 (81.5%) |                   |
| right                             | 120 | 28 (23.3%) | 92 (76.7%)  |                   |
| ER status                         |     |            |             | 0.580             |
| negative                          | 129 | 25 (19.5%) | 103 (80.5%) |                   |
| positive                          | 115 | 26 (22.4%) | 90 (77.6%)  |                   |
| PR status                         |     |            |             | 0.103             |
| negative                          | 144 | 25 (17.4%) | 119 (82.6%) |                   |
| positive                          | 100 | 26 (26.0%) | 74 (74.0%)  |                   |
| Her-2 status                      |     |            |             | <b>0.045*</b>     |
| negative                          | 168 | 41 (24.4%) | 127 (75.6%) |                   |
| positive                          | 76  | 10 (13.2%) | 65 (86.8%)  |                   |
| TNBC                              |     |            |             | 0.380             |
| negative                          | 223 | 48 (21.6%) | 174 (78.4%) |                   |
| positive                          | 21  | 3 (13.6%)  | 19 (86.4%)  |                   |
| Histological grade                |     |            |             | <b>&lt;0.001*</b> |
| well differentiated<br>(G1)       | 15  | 13 (86.7%) | 2 (13.3%)   |                   |
| moderately<br>differentiated (G2) | 143 | 31 (21.7%) | 112 (78.3%) |                   |
| poorly differentiated<br>(G3)     | 86  | 7 (8.1%)   | 79 (91.0%)  |                   |
| Pathological Tumor<br>status (pT) |     |            |             | 0.484             |
| T1                                | 28  | 9 (32.1%)  | 19 (67.9%)  |                   |
| T2                                | 119 | 23 (19.3%) | 96 (80.7%)  |                   |
| T3                                | 34  | 7 (20.6%)  | 27 (79.4%)  |                   |
| T4                                | 63  | 12 (19.0%) | 51 (81.0%)  |                   |
| Pathological TNM<br>Staging       |     |            |             | 0.090             |
| I-II                              | 90  | 24 (26.7%) | 66 (73.3%)  |                   |

III 154 27(17.5%) 127(82.5%)

\* P < 0.05, statistically significant.

Abbreviation: ER: estrogen receptor, PR: progesterone receptor, T: tumor, N: node, TNM: tumor node metastasis , TNBC: triple negative breast cancer, OS: overall survival, DFS: disease-free survival, NR: not reached

**Table S2. CST1 expression in breast cancer patients by Kaplan-Meier survival analysis (log-rank test)**

| Variable                       | Case  | DFS (months) |        |         | OS (months) |        |         |
|--------------------------------|-------|--------------|--------|---------|-------------|--------|---------|
|                                |       | Mean         | Median | P-value | Mean        | Median | P-value |
| Total                          |       |              |        |         |             |        |         |
| low expression                 | 51.0  | 127.7        | NR     | <0.001* | 134.5       | NR     | <0.001* |
| high expression                | 193.0 | 82.1         | 82.7   |         | 83.8        | 84.7   |         |
| Tumor size                     |       |              |        |         |             |        |         |
| diameter ≤ 2.5(cm)             |       |              |        |         |             |        |         |
| low expression                 | 26.0  | 129.9        | NR     | 0.005*  | 138.0       | NR     | 0.002*  |
| high expression                | 58.0  | 85.0         | 82.2   |         | 85.6        | 82.2   |         |
| Tumor size                     |       |              |        |         |             |        |         |
| diameter > 2.5(cm)             |       |              |        |         |             |        |         |
| low expression                 | 26.0  | 123.2        | NR     | 0.003*  | 126.9       | NR     | 0.002*  |
| high expression                | 135.0 | 79.1         | 82.7   |         | 81.4        | 84.7   |         |
| Tumor differentiation          |       |              |        |         |             |        |         |
| T1-2                           |       |              |        |         |             |        |         |
| low expression                 | 32.0  | 119.2        | NR     | 0.031*  | 127.7       | NR     | 0.019*  |
| high expression                | 115.0 | 88.0         | 83.2   |         | 87.8        | 93.0   |         |
| T3-4                           |       |              |        |         |             |        |         |
| low expression                 | 19.0  | 138.7        | NR     | <0.001* | 140.1       | NR     | <0.001* |
| high expression                | 78.0  | 71.7         | 55.4   |         | 74.5        | 58.5   |         |
| Lymph node metastasis status   |       |              |        |         |             |        |         |
| Lymph node metastasis negative |       |              |        |         |             |        |         |
| low expression                 | 19.0  | 131.6        | NR     | 0.171   | 131.6       | NR     | 0.208   |
| high expression                | 49.0  | 85.3         | NR     |         | 102.2       | NR     |         |
| Lymph node metastasis positive |       |              |        |         |             |        |         |
| low expression                 | 32.0  | 122.4        | NR     | <0.001* | 130.8       | NR     | 0.001*  |
| high expression                | 144.0 | 72.7         | 55.0   |         | 74.6        | 58.5   |         |

|                  |       |       |      |                   |       |      |                   |
|------------------|-------|-------|------|-------------------|-------|------|-------------------|
| ER negative      |       |       |      |                   |       |      |                   |
| low expression   | 25.0  | 122.5 | NR   | <b>0.002*</b>     | 130.7 | NR   | <b>&lt;0.001*</b> |
| high expression  | 103.0 | 71.1  | 47.1 |                   | 74.0  | 47.8 |                   |
| ER positive      |       |       |      |                   |       |      |                   |
| low expression   | 26.0  | 129.9 | NR   | <b>0.003*</b>     | 130.8 | NR   | <b>0.003*</b>     |
| high expression  | 90.0  | 94.6  | NR   |                   | 94.7  | NR   |                   |
| PR negative      |       |       |      |                   |       |      |                   |
| low expression   | 25.0  | 126.4 | NR   | <b>0.001*</b>     | 134.0 | NR   | <b>0.003*</b>     |
| high expression  | 119.0 | 74.1  | 58.5 |                   | 75.6  | 59.7 |                   |
| PR positive      |       |       |      |                   |       |      |                   |
| low expression   | 26.0  | 126.8 | NR   | <b>0.011*</b>     | 127.8 | NR   | <b>0.012*</b>     |
| high expression  | 74.0  | 94.6  | NR   |                   | 96.9  | NR   |                   |
| HER2 negative    |       |       |      |                   |       |      |                   |
| low expression   | 41.0  | 130.8 | NR   | <b>&lt;0.001*</b> | 139.3 | NR   | <b>&lt;0.001*</b> |
| high expression  | 127.0 | 78.9  | 82.2 |                   | 80.4  | 82.7 |                   |
| Her-2 positive   |       |       |      |                   |       |      |                   |
| low expression   | 10.0  | 103.4 | NR   | 0.313             | 113.0 | NR   | 0.177             |
| high expression  | 66.0  | 82.3  | NR   |                   | 85.3  | NR   |                   |
| TNM staging      |       |       |      |                   |       |      |                   |
| I-II             |       |       |      |                   |       |      |                   |
| low expression   | 24.0  | 80.8  | NR   | 0.202             | 132.1 | NR   | 0.204             |
| high expression  | 66.0  | 81.1  | NR   |                   | 95.6  | NR   |                   |
| III              |       |       |      |                   |       |      |                   |
| low expression   | 27.0  | 127.0 | NR   | <b>&lt;0.001*</b> | 134.7 | NR   | <b>&lt;0.001*</b> |
| high expression  | 127.0 | 70.0  | 52.2 |                   | 73.3  | 55.4 |                   |
| Histologic grade |       |       |      |                   |       |      |                   |
| G2-3             |       |       |      |                   |       |      |                   |
| low expression   | 39.0  | 94.4  | NR   | <b>&lt;0.001*</b> | 95.3  | NR   | <b>&lt;0.001*</b> |
| high expression  | 191.0 | 81.6  | NR   |                   | 83.4  | NR   |                   |

\* P < 0.05, statistically significant.

Abbreviation: ER: estrogen receptor, PR: progesterone receptor, T: tumor, N: node, TNM: tumor-node-metastasis, OS: overall survival, DFS: disease-free survival, NR: not reached

**Table S3. Univariate COX regression analysis for overall survival and disease-free survival in patients with breast cancer**

| Variables                               | Overall survival |                  |                   | Disease-free survival |                  |                   |
|-----------------------------------------|------------------|------------------|-------------------|-----------------------|------------------|-------------------|
|                                         | HR               | (95%CI)          | p value           | HR                    | (95%CI)          | p value           |
| Age (years)<br>(≤50 vs >50)             | 0.891            | 0.598-1.326      | 0.568             | 0.889                 | 0.597-1.325      | 0.564             |
| Tumor location<br>(right/left)          | 1.051            | 0.707-1.562      | 0.804             | 1.055                 | 0.710-1.567      | 0.792             |
| Tumor Size (cm)<br>(≤2.5 vs >2.5)       | 1.680            | 1.073-2.632      | <b>0.023*</b>     | 1.619                 | 1.033-2.537      | <b>0.035*</b>     |
| Menarche age<br>(years)<br>(≤16 vs >16) | 0.733            | 0.416-1.292      | 0.283             | 0.705                 | 0.400-1.242      | 0.226             |
| Menopause<br>(no vs yes)                | 0.900            | 0.598-1.355      | 0.613             | 0.918                 | 0.610-1.384      | 0.684             |
| Histological<br>grade<br>(G3/G2/G1)     | 2.544            | 1.766-3.663      | <b>&lt;0.001*</b> | 2.380                 | 1.647-3.438      | <b>&lt;0.001*</b> |
| Tumor status<br>(T4/T3/T2/T1)           | 1.209            | 0.997-1.465      | 0.054             | 1.209                 | 0.995-1.468      | 0.056             |
| Nodal status<br>(N>0/N0)                | 4.544            | 2.286-9.033      | <b>&lt;0.001*</b> | 4.803                 | 2.417-9.547      | <b>&lt;0.001*</b> |
| TNM staging<br>(I-II/III)               | 2.826            | 1.708-4.677      | <b>&lt;0.001*</b> | 2.931                 | 1.772-4.850      | <b>&lt;0.001*</b> |
| ER (negative vs<br>positive)            | 0.514            | 0.341-0.776      | <b>0.002*</b>     | 0.485                 | 0.321-0.732      | <b>0.001*</b>     |
| PR (negative vs<br>positive)            | 0.536            | 0.349-0.824      | <b>0.004*</b>     | 0.512                 | 0.333-0.787      | <b>0.002*</b>     |
| Her2 (negative<br>vs positive)          | 1.363            | 0.900-2.064      | 0.143             | 1.449                 | 0.958-2.193      | 0.079             |
| TNBC (negative<br>vs positive)          | 1.788            | 0.977-3.273      | 0.059             | 1.677                 | 0.916-3.069      | 0.094             |
| CST1 expression<br>(High/Low)           | 5.611            | 2.443-12.88<br>8 | <b>&lt;0.001*</b> | 5.083                 | 2.219-11.64<br>4 | <b>&lt;0.001*</b> |

\* P < 0.05, statistically significant.

Abbreviation: CST1: cystatin SN, ER: estrogen receptor, PR: progesterone receptor, TNBC: triple negative breast cancer, OS: overall survival, DFS: disease-free survival, NS: not significant, HR: hazard ratio, 95%CI: 95% confidential interval

**Table S4. Multivariate COX regression analysis for overall survival and disease-free survival in patients with breast cancer**

| Variables      | Overall survival |            |               | Disease-free survival |            |               |
|----------------|------------------|------------|---------------|-----------------------|------------|---------------|
|                | HR               | (95%CI)    | p value       | HR                    | (95%CI)    | p value       |
| Tumor Size     |                  | 0.628-1.62 |               |                       | 0.600-1.55 |               |
| (cm)           |                  |            |               |                       |            |               |
| (≤2.5 vs >2.5) | 1.009            | 2          | 0.970         | 0.964                 | 0          | 0.881         |
| Histological   |                  | 1.277-2.85 |               |                       | 1.220-2.73 |               |
| grade          |                  |            |               |                       |            |               |
| (G3/G2/G1)     | 1.908            | 2          | <b>0.002*</b> | 1.828                 | 9          | <b>0.003*</b> |
| Nodal status   |                  | 1.536-7.03 |               |                       | 1.564-7.09 |               |
| (N>0/N0)       | 3.287            | 3          | <b>0.002*</b> | 3.332                 | 6          | <b>0.002*</b> |
| TNM staging    |                  | 0.924-2.93 |               |                       | 0.978-3.09 |               |
| (I-II/III)     | 1.647            | 8          | 0.091         | 1.739                 | 0          | 0.059         |
| ER             |                  | 0.409-1.01 |               |                       | 0.402-1.00 |               |
| (negative vs   |                  |            |               |                       |            |               |
| positive)      | 0.644            | 5          | 0.058         | 0.636                 | 5          | 0.053         |
| PR             |                  | 0.470-1.20 |               |                       | 0.469-1.20 |               |
| (negative vs   |                  |            |               |                       |            |               |
| positive)      | 0.752            | 3          | 0.235         | 0.751                 | 4          | 0.235         |
| CST1           |                  | 1.428-8.05 |               |                       | 1.258-7.01 |               |
| expression     |                  |            |               |                       |            |               |
| (high/low)     | 3.390            | 2          | <b>0.006*</b> | 2.971                 | 5          | <b>0.013*</b> |

\* P < 0.05, statistically significant.

Abbreviation: CST1: cystatin SN, ER: estrogen receptor, PR: progesterone receptor, OS: overall survival, DFS: disease-free survival, NS: not significant, HR: hazard ratio, 95%CI: 95% confidential interval

## Supplementary figures

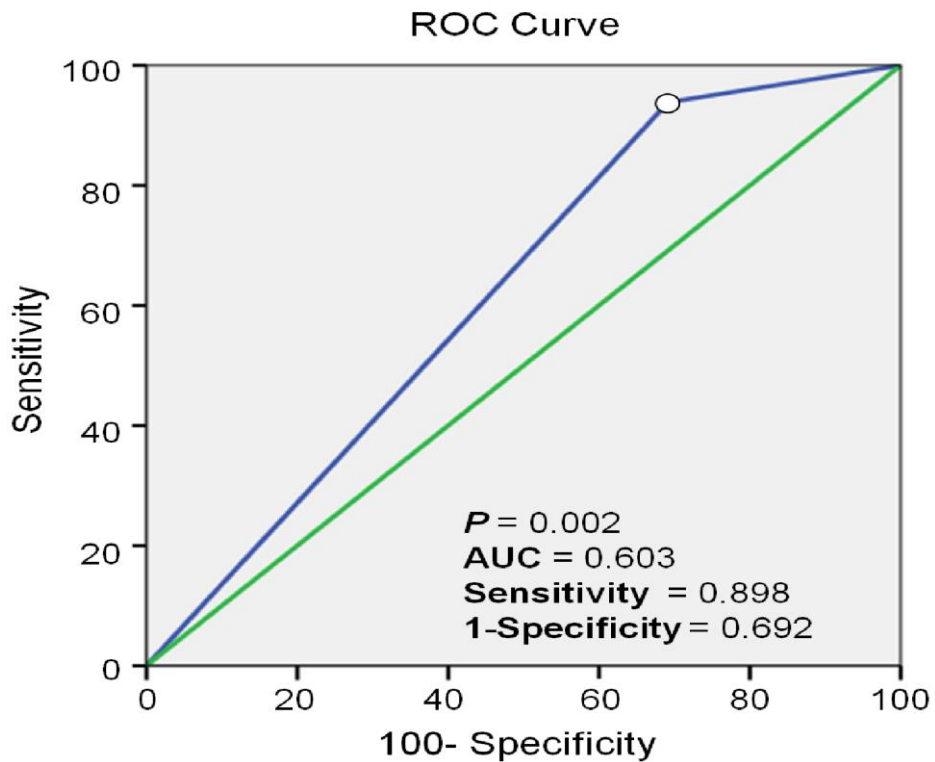

**Fig. S1 Receiver operating curve (ROC) for the CST1 expression cutoff value plotted by survival status**

The green line represents the completely random prediction. The blue line (the ROC curve) represents the ability of CST1 upregulation to predict survival status. The white dot represents the optimal prediction point.
